# Supplementary material
Source: PubMed Central journal article supplement (PMC3490450)
Supplement: NIHMS389066-supplement-ESI.pdf [file NIHMS389066-supplement-ESI.pdf]

# Architectural layer-by-layer assembly of drug nanocapsules with PEGylated polyelectrolytes

Tatsiana G. Shutava,<sup>a</sup> Pravin P. Pattekari,<sup>a</sup> Kirill A. Arapov,<sup>a</sup> Vladimir P. Torchilin<sup>a</sup> and Yuri M. Lvov<sup>a</sup>  
 DOI: 10.1039/c2sm25683e

5

## Supplementary Information

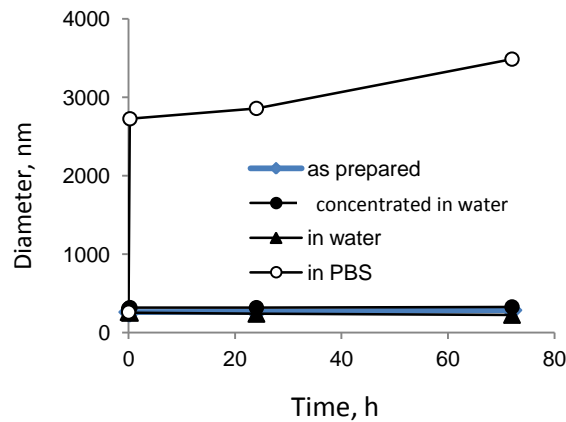

10

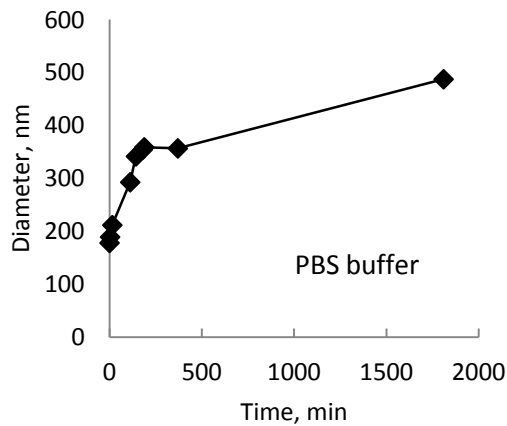

b

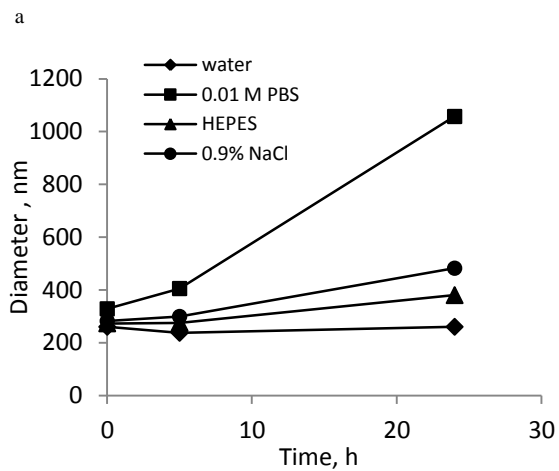

c

Fig. A Colloidal stability of LbL-coated paclitaxel nanoparticles (prepared in water) in different media. Shell: a) (PLL/Hep)<sub>4</sub>/PLL b) (PLL/Hep)<sub>4</sub>/PLG65[4.5]<sub>5</sub>/Hep, b) (PLG65[4.5]<sub>5</sub>/Hep)<sub>4</sub>

15

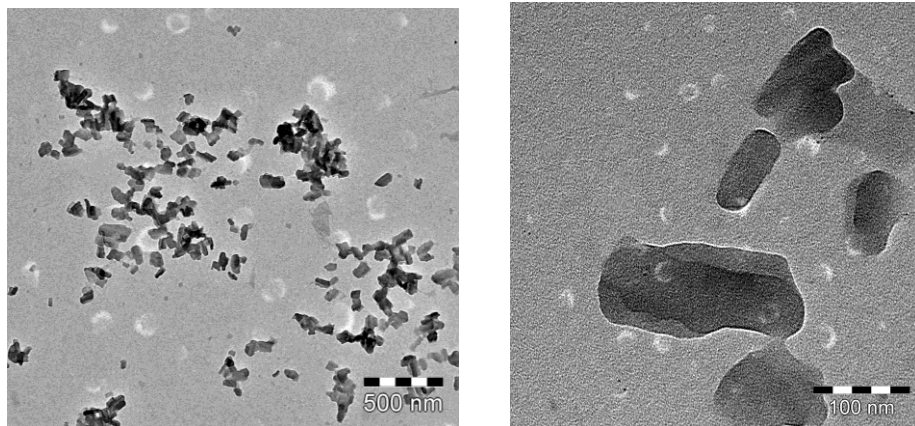

Fig.B TEM images of camptothecin nanoparticles coated with a Hep/(PLB16-5/Hep)<sub>4</sub> shell

Table A. Content of surfactants remaining adsorbed on PXT colloids\*

| Surfactant                                                        | Recovery of crystalline PTX nanoparticles, % | Amount of surfactant, remaining adsorbed on nanoparticles, $\mu\text{mol}/\text{mg}$ PTX | Hydrodynamic diameter, nm |
|-------------------------------------------------------------------|----------------------------------------------|------------------------------------------------------------------------------------------|---------------------------|
| Docusate sodium salt (AOT)                                        | 84.2 $\pm$ 7.4                               | 1.03 $\pm$ 0.23                                                                          | 140-210                   |
| Glycolic acid ethoxylate oleyl ether (Oleth-6 carboxylic acid)    | 89                                           | 0.56                                                                                     | 92.5 $\pm$ 2.5            |
| Glycolic acid ethoxylate lauryl ether (Laureth-6 carboxylic acid) | 64                                           | 0.65                                                                                     | 126.6 $\pm$ 2.5           |
| Dodecyl sulphate sodium salt (SDS)                                | 76                                           | 0.17                                                                                     | 2000-9000                 |
| SDS- no PVP                                                       | $\sim$ 100                                   | 0.27                                                                                     | $\sim$ 300                |
| Poly(maleic acid-co-olefin) sodium salt                           | -                                            | 0.17-0.25                                                                                | 122.5 $\pm$ 2.0           |

\*The amount of surfactants adsorbed on PTX nanoparticles was estimated using the pinacyanol assay for negatively charged sites.

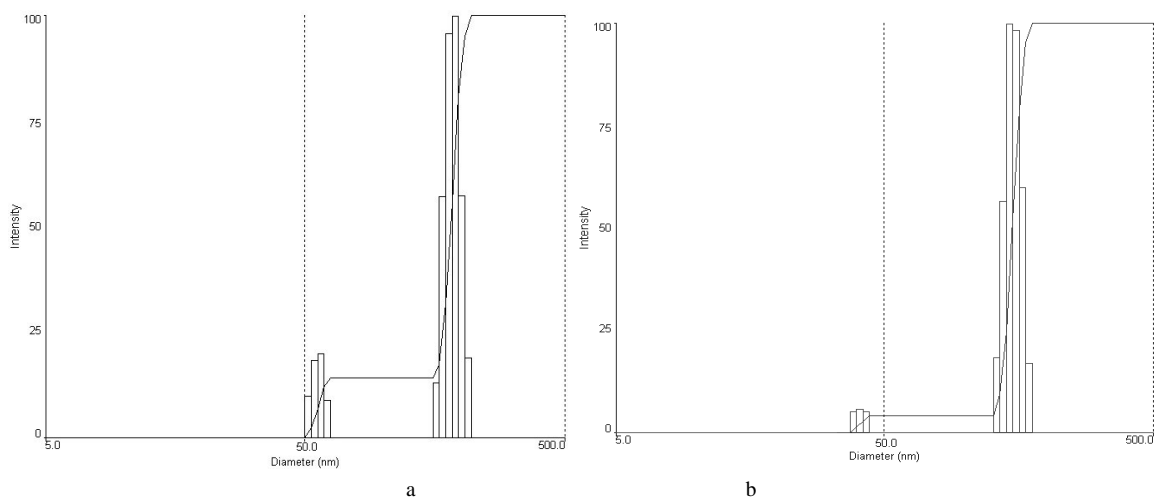

Fig. C DLS distribution of apparent hydrodynamic diameter of LbL coated PTX nanoparticles as prepared.

Shell: a) (PLB16-5/Hep)<sub>3.5</sub>; b) (PLB16-5/Hep)<sub>7.5</sub>

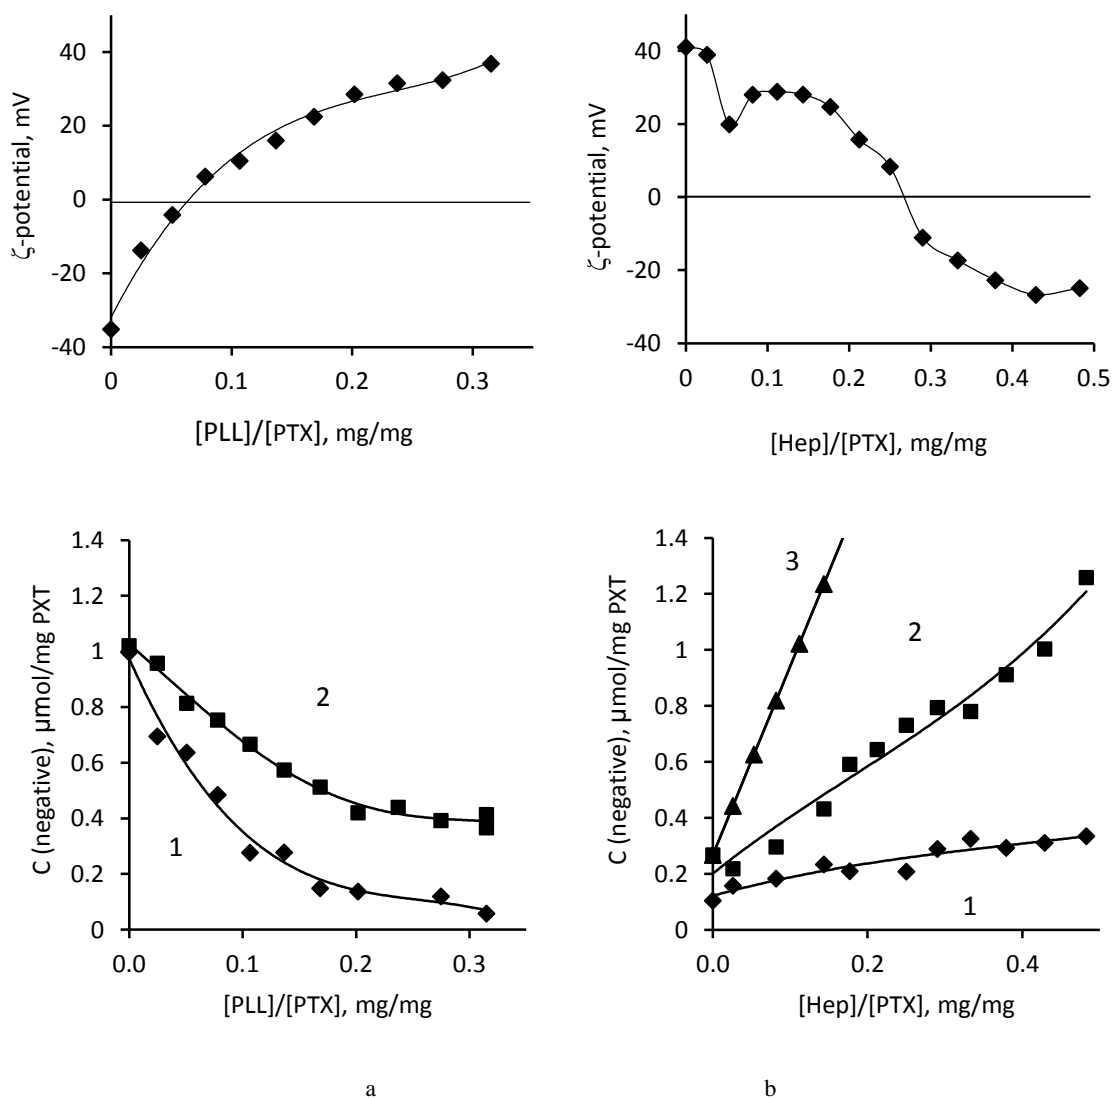

Fig. D Changes of  $\zeta$ -potential (upper row) and amounts of negative sites estimated by the pinacyanol assay (lower row) in the process of step-wise addition of a) PLL to PTX/AOT cores, b) Hep to PTX/AOT/PLL nanoparticles. Lower row: 1 – nanoparticles, 2- total experimental, 3 – calculated.

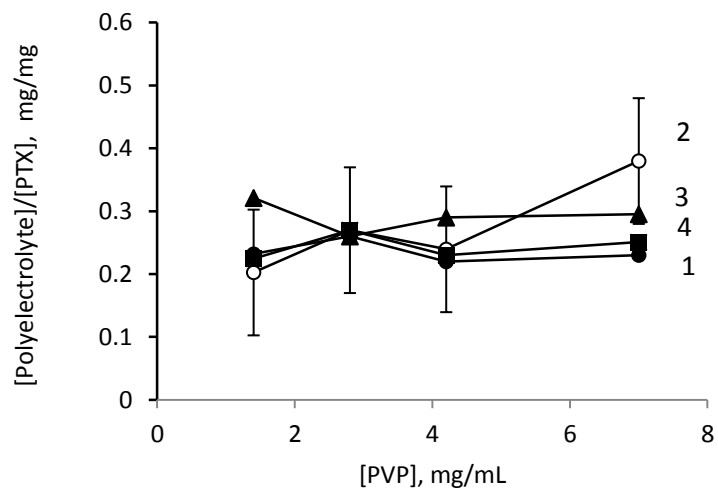

Fig.E Influence of PVP concentration on amounts of PLB16-5 (1, 3) and Hep (2, 4) added to reverse  $\zeta$ -potential of nanoparticles. The polyelectrolytes were added in the following orders: 1-2-3-4

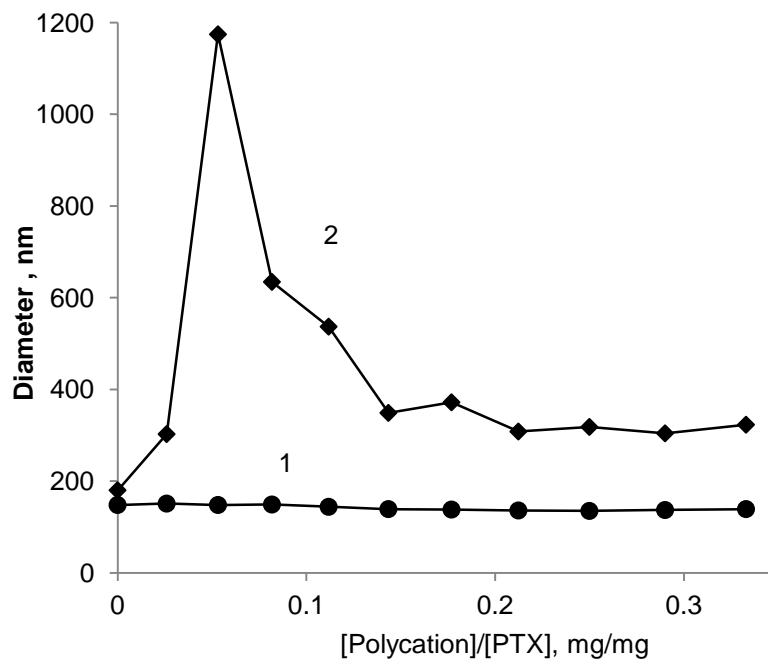

Fig. F Changes of apparent hydrodynamic diameter of PTX nanoparticles in the process of step-wise addition of heparin to nanoparticles coated with a PLB16-5 (1) and a PLL (2) layer

5

10

15

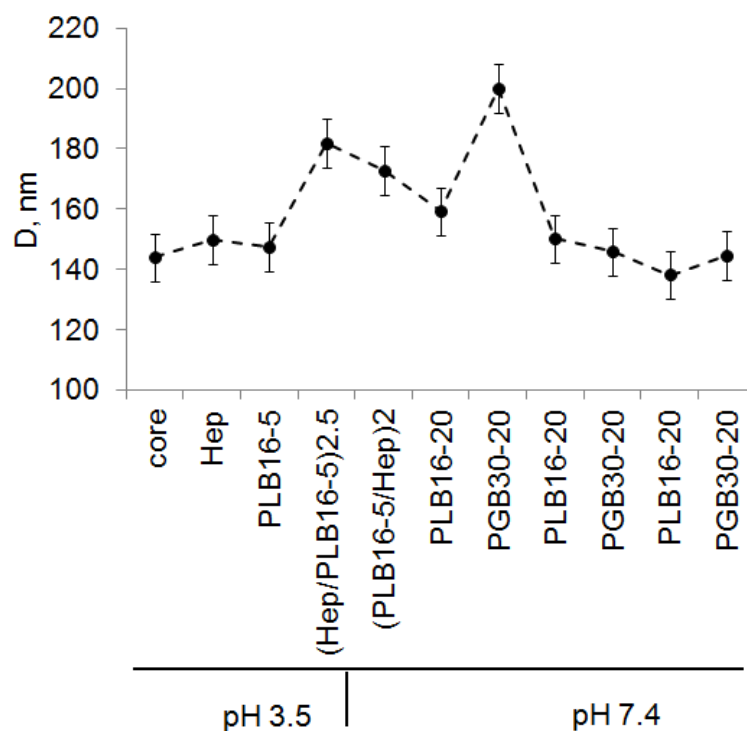

5 Fig.G Changes of hydrodynamic diameter of CPT nanoparticles upon adsorption of different polyelectrolytes on their surface (a ZetaPlus Brookhaven instrument)

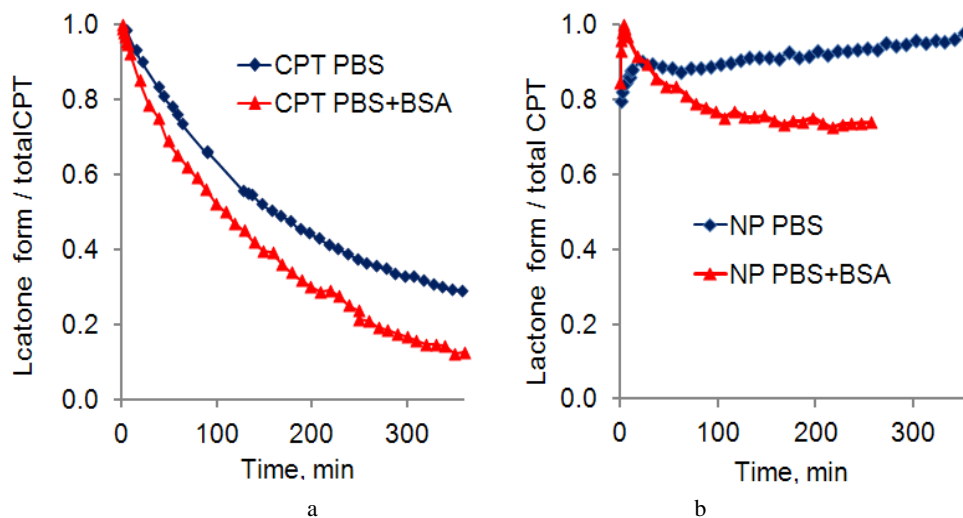

30 Fig.H Degradation of the lactone (353 nm) form of CPT in PBS buffer and a 40 mg/mL BSA solution. a) free CPT added in DMSO, b) 180 nm nanoparticles coated with a Hep/(PLB16-5/Hep)<sub>3</sub>/(PLB16-20/PGB30-20)<sub>2.5</sub> shell. 23 °C, pH 7.4, C(CPT)=3.5 µg/mL

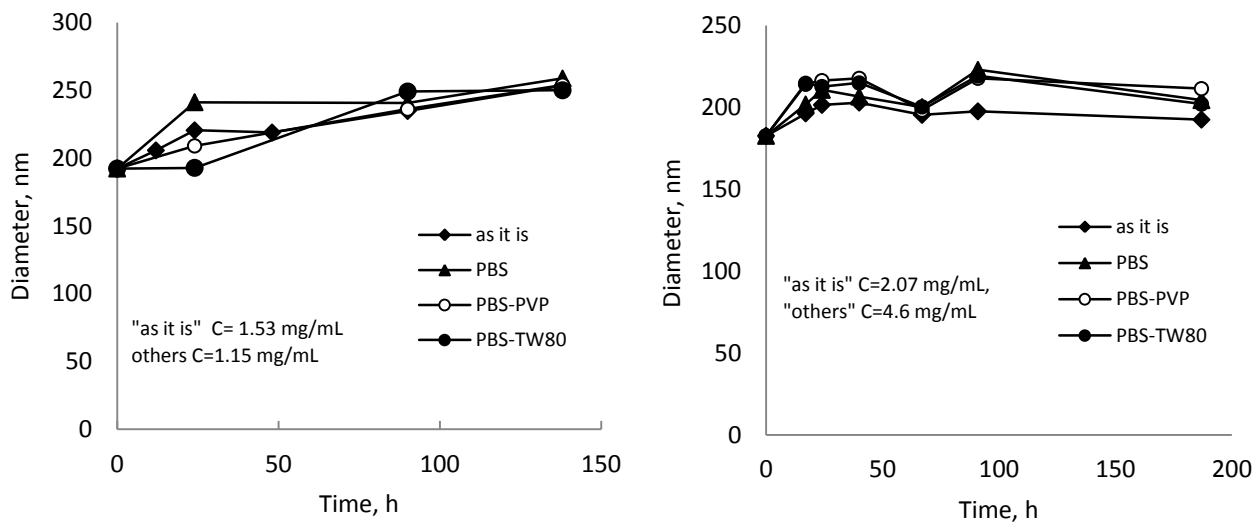

5 Fig. I Apparent diameter of selected samples of PTX nanoparticles coated with a (PLB16-5/Hep)<sub>3.5</sub> shell as a function of time. Samples were dispersed in: supernatant ("as it is"), PBS, PBS-0.7 mg/mL PVP, PBS+ 0.7 mg/mL Polysorbate 80. Concentrations as shown on the graphs

10

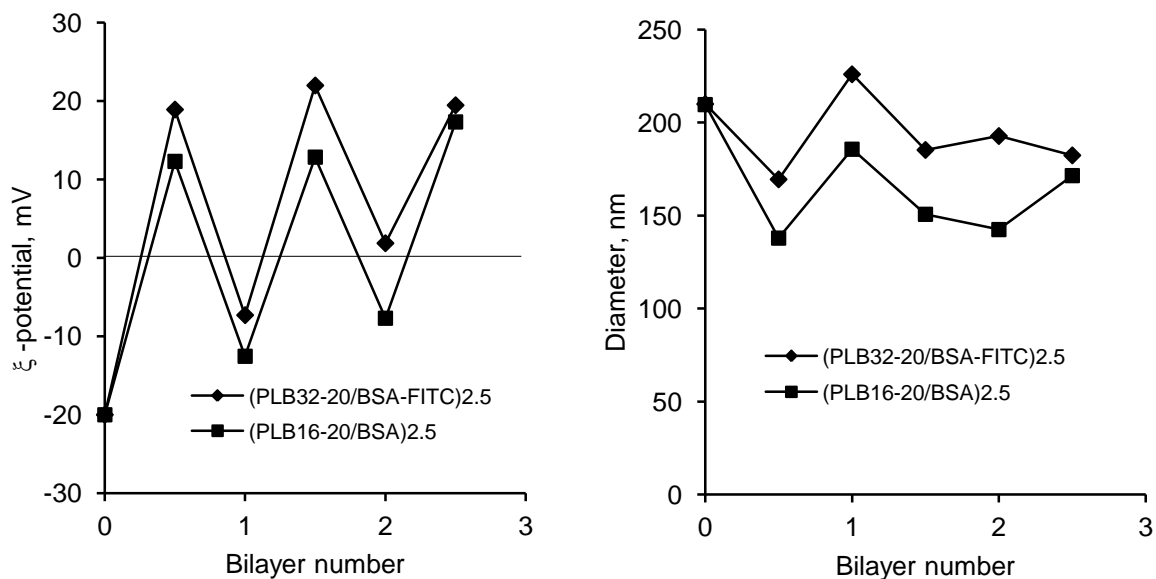

Fig.J Changes of  $\zeta$ - potential (a) and hydrodynamic diameter (b) in the process of LbL assembly using BSA. Shell architecture is shown on the graphs

15

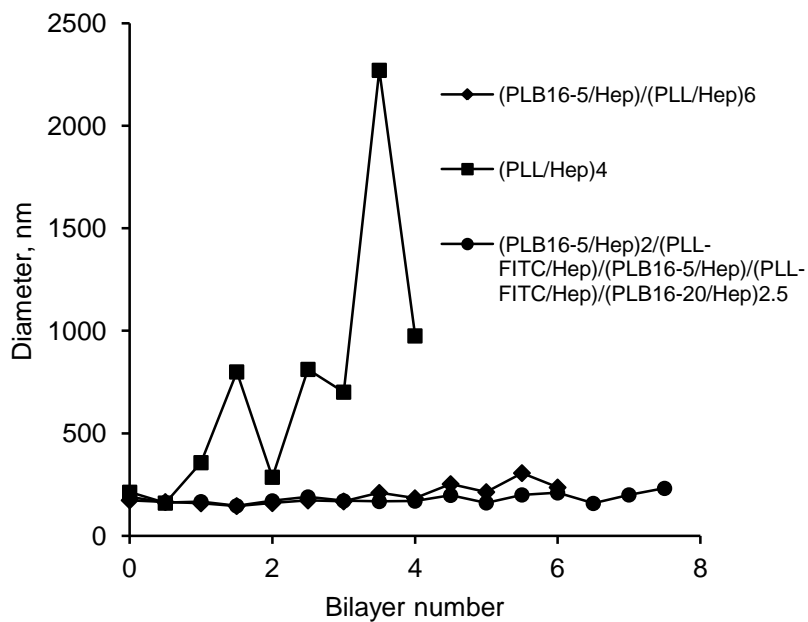

Fig. K Changes of hydrodynamic diameter in the process of LbL assembly of shells with different architecture using non-PEGylated and PEGylated polylysines.

5

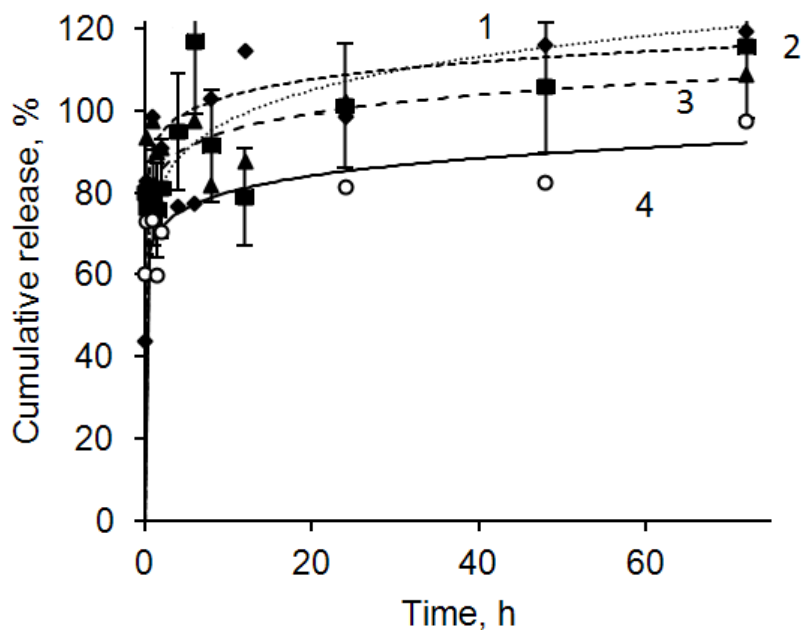

Fig. L Paclitaxel release from 170 nm nanocolloids coated with a (PLB16-5/Heparin)<sub>n</sub> shell.

Number of bilayer in shell n: 1- 0.5, 2-1.5, 3-2.5, 4-3.5. C(PTX)=2.0±0.4 µg/mL. 0.2% Polysorbate80 in PBS at 37 °C.

10

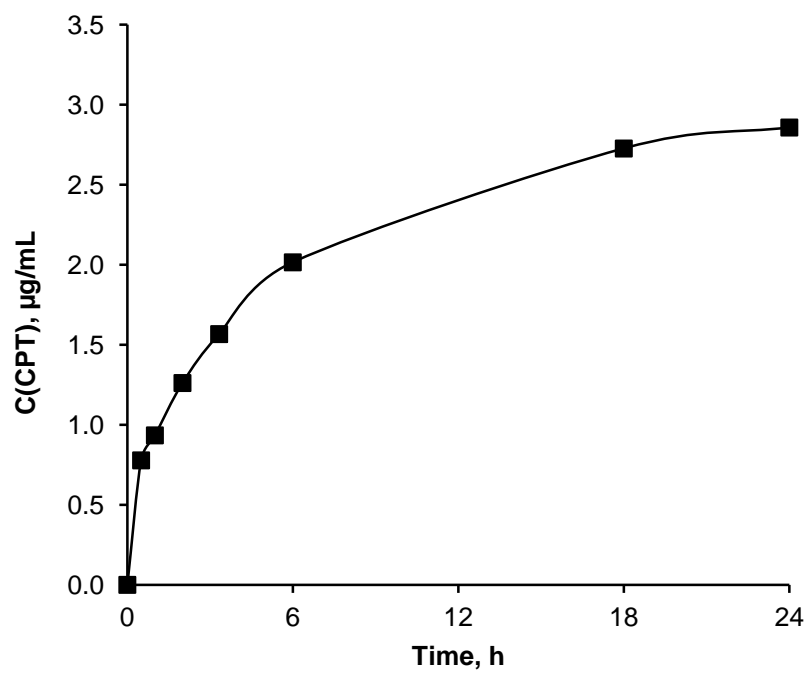

Fig. M Release of camptothecin from 160 nm nanocapsules with a (Hep/PLB16-5)<sub>4,5</sub> shell architecture.

PBS + 2% Polysorbate 80. C (CPT) = 9.3 µg/mL
